# Supplementary material for: Microvesicle-Mediated Delivery of Minicircle DNA Results in Effective Gene-Directed Enzyme Prodrug Cancer Therapy
Source: Oxford University Press journal article supplement (doi:10.1158/1535-7163.mct-19-0299), 2019-08-26
Supplement: 15357163mct190299-sup-219368_2_supp_5652876_pbsjds.docx [file 15357163mct190299-sup-219368_2_supp_5652876_pbsjds.docx]

**Supplementary Figure S1**

**
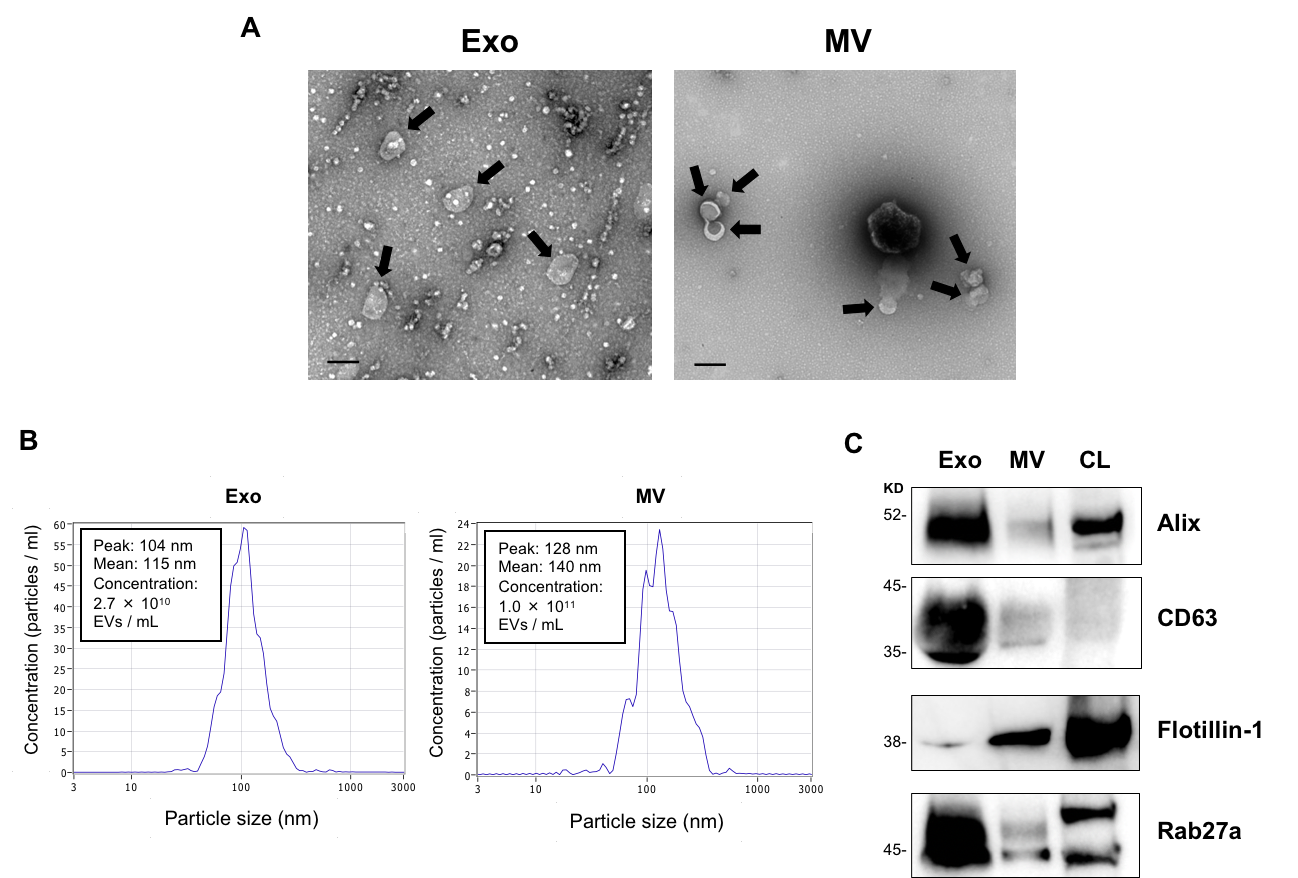
**

**Supplementary Figure S1.** Morphological and biochemical analysis of exosomes and MVs. **A,** Higher (exosome) and lower (MV) density EVs were visualized by transmission electron microscopy. Scale bar: 200 nm. Arrows indicate small EVs. **B,** Nanoparticle tracking analysis of higher (exosome) and lower (MV) density EVs derived from 4T1 cells. **C,** Western blot analysis of exosome marker proteins in higher (exosome), lower (MV) density EVs, and cell lysates (CL).

**Supplementary Figure S2**

**
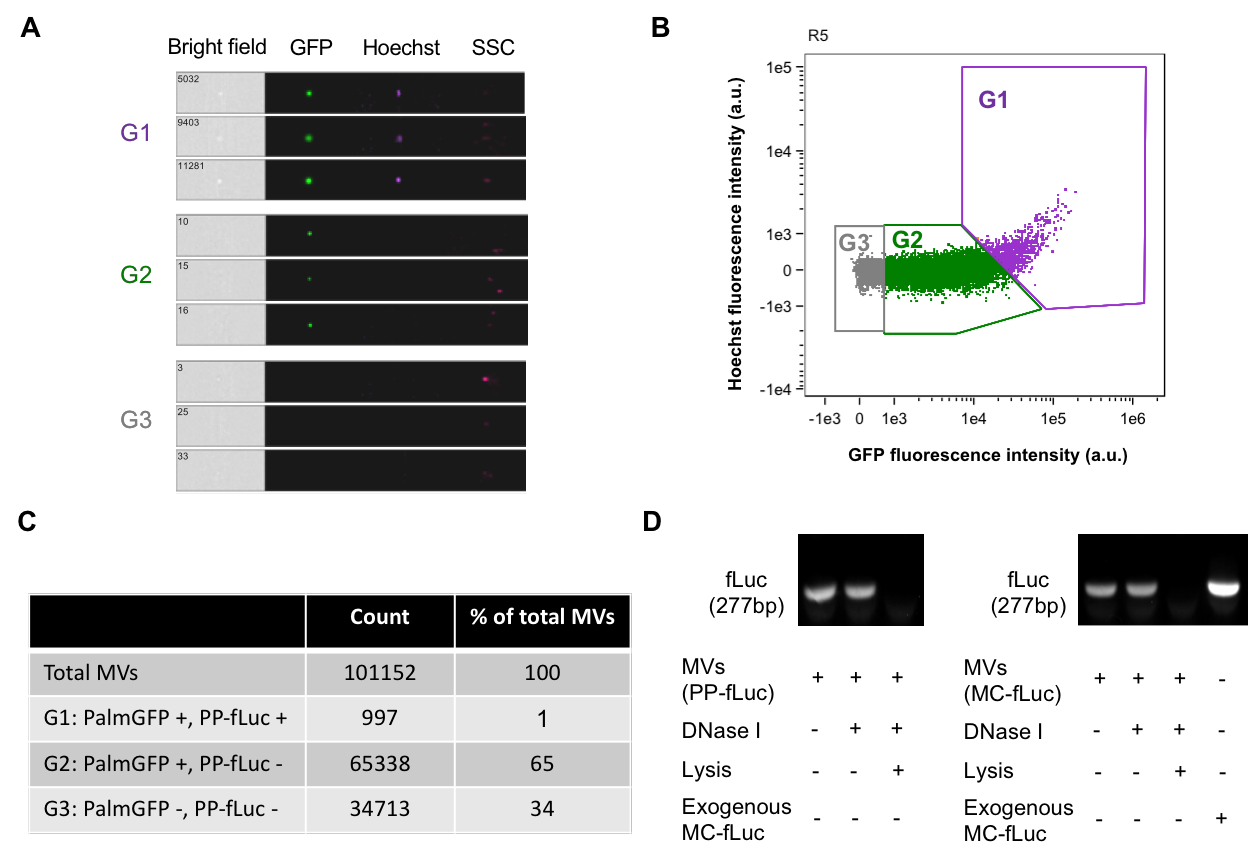
**

**Supplementary Figure S2.** Analysis of reporter gene loading into MVs. **A,** Representative images from each MV population. G1 shows MVs expressing PalmGFP and containing the pre-stained PP-fLuc (Hoechst). G2 shows MVs expressing PalmGFP without PP-fLuc loading. G3 shows neither PalmGFP expression nor PP-fLuc loading. **B,** The fluorescence signals of PalmGFP and pre-stained PP-fLuc (Hoechst) from MVs were analyzed by imaging flow cytometry. **C,** Counts of both positive (G1), single positive (G2), both negative (G3) were calculated. **D,** Analysis of the reporter gene protection by being encapsulated in MVs. PP-fLuc or MC-fLuc were detected by PCR after DNase I treatment.

**Supplementary Figure S3**

**
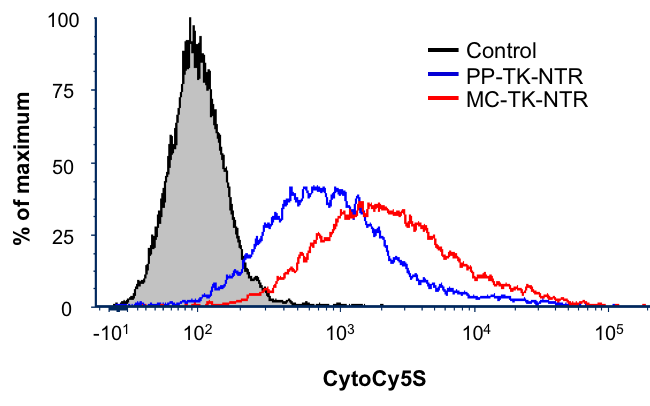
**

**Supplementary Figure S3.** Flow cytometry histogram overlay of live 4T1 cells without transfection, with PP-TK-NTR (blue), or with MC-TK-NTR (red) treated with CytoCy5S.

**Supplementary Figure S4**

**Supplementary Figure S4.** NTR activity in breast cancer cells stably expressing TK-NTR. **A-B,** Microscopic images of 4T1 cells (**A**) or MDA-MB-231 cells (**B**) stably expressing TK-NTR 3 h after exposure to CytoCy5S. Scale bars: 400 µm.

**Supplementary Figure S5**

**
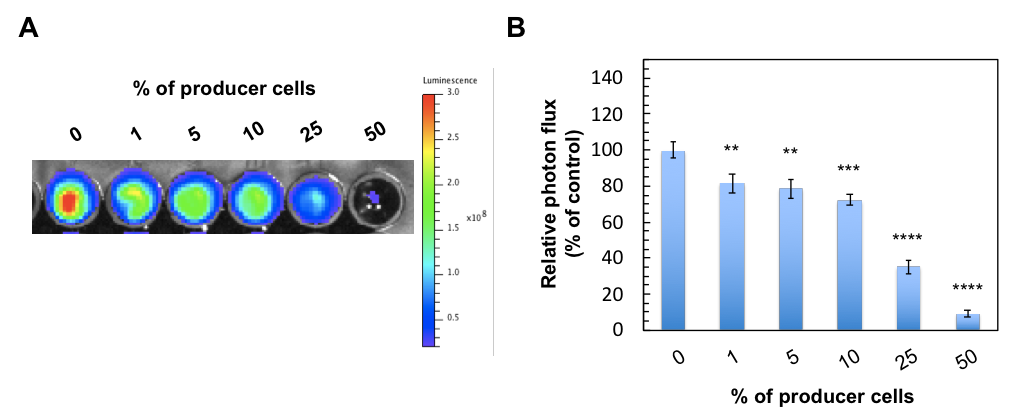
**

**Supplementary Figure S5.** Efficient diffusion of activated cytotoxic agents from producer MDA-MB-231 cells. **A,** Cell killing effects of different percent of MDA-MB-231 cells stably expressing TK-NTR in the presence of prodrugs. **B,** Analysis of the bioluminescence in (**A**). Error bars represent s.d. (n = 3) **P < 0.01, ***P < 0.001, ****P < 0.0001 compared to the value of control.

**Supplementary Figure S6**

**Supplementary Figure S6.** Cell-to-cell contact independent diffusion of activated cytotoxic agents from 4T1 cells expressing TK-NTR. **A,** Schematic drawing of the transwell assay chamber. **B,** The producer cells were cultured on the top wells, whereas the reporter cells were cultured on the bottom wells. **C,** Analysis of the bioluminescence in **(B)**. Error bars represent s.d. (n = 4) **P < 0.01, ****P < 0.0001 compared to the value of control.

**Supplementary Figure S7**

**
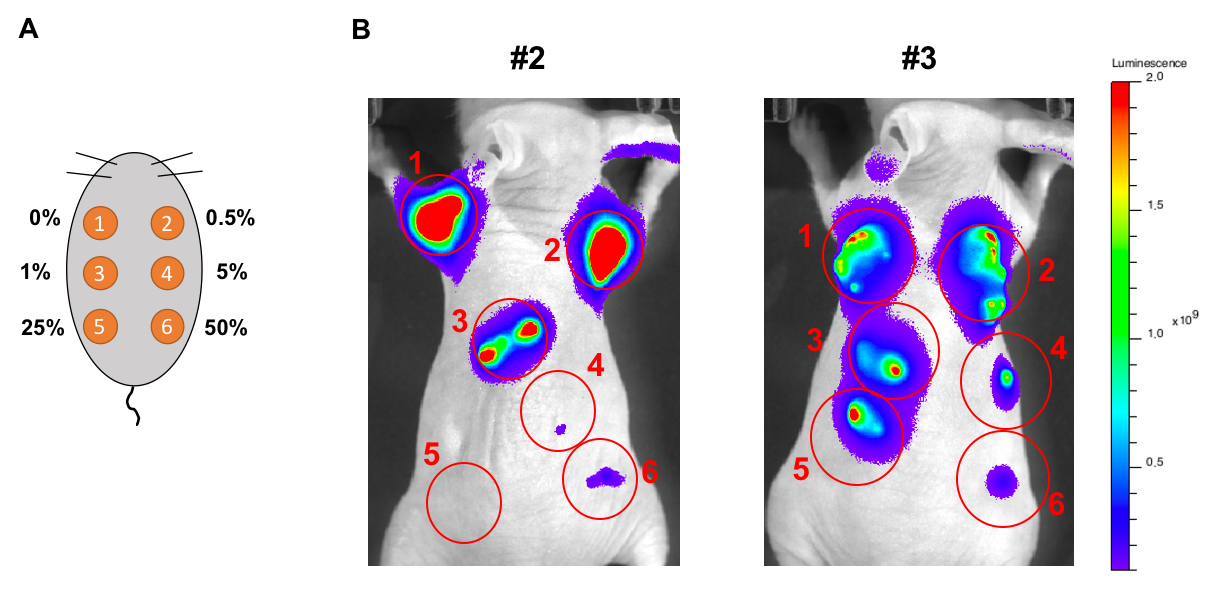
**

**Supplementary Figure S7.** Efficient diffusion of activated cytotoxic agents from 4T1 cells expressing TK-NTR *in vivo*. **A,** Positions of subcutaneous tumors containing different percentages of TK-NTR expressing 4T1 cells (0, 0.5, 1, 5, 25, 50% within a population of wildtype 4T1 cells). **B,** *In vivo* bioluminescence imaging of reporter 4T1 cells containing different percentages of TK-NTR expressing 4T1 cells in nude mice after the treatment with prodrugs.
